# Supplementary material for: Microbial growth in biobeds for treatment of residual pesticide in banana plantations
Source: PeerJ. 2021 Sep 22;9:e12200. doi: 10.7717/peerj.12200 (PMC8464193; doi:10.7717/peerj.12200)
Supplement: Supplemental Information 1 — The measurements of the physicochemical and biological parameters evaluated, such as pH, moisture, cation exchange capacity, organic matter content, pesticide concentration, colony, and microbial cell counts. [file peerj-09-12200-s001.xlsx]

## Sheet: Crude
Treatment	Time (days)	Level	pH	Moisture (%)	Cation exchange capacity (cmol(+) kg-1)	Organic matter (%)	Bacterial colonies (Log CFU mL-1 x106)	Fungal colonies (Log CFU mL-1 x104)	Bacterial count (Log cells mL-1 x104)	Fungal count (Log cells mL-1 x102)	Ethylenthiourea (mg kg-1)
Soil	0	Surface	5.5	42.1	65.3	6.4	440	12	80	20	0	0
Soil	0	Surface	5.3	41.3	66	6.8	480	16	75	20	0	0
Soil	0	Surface	5.4	46.3	62.4	6.1	480	16	90	15	0	0
Soil	0	Medium	5.5	51.3	68.5	6.7	560	20	110	25	0	0
Soil	0	Medium	5.6	47.6	67.6	6.5	520	16	105	25	0	0
Soil	0	Medium	5.3	45.6	70.2	6.3	520	16	95	15	0	0
Soil	0	Bottom	6	51.3	71.3	6.6	560	20	95	25	0	0
Soil	0	Bottom	5.5	49.2	68.3	6.5	640	24	85	20	0	0
Soil	0	Bottom	5.8	52.3	67.5	6.6	480	20	75	20	0	0
Soil	7	Surface	5.6	41.2
Soil	7	Surface	5.6	43.2
Soil	7	Surface	5.7	44.2
Soil	7	Medium	5.6	50.6
Soil	7	Medium	5.7	49.8
Soil	7	Medium	5.6	47.6
Soil	7	Bottom	5.9	55.5
Soil	7	Bottom	5.8	52.2
Soil	7	Bottom	6.4	53.1
Soil	14	Surface	5.8	45.5	68.4	6.4	400	16	70	15	0	0
Soil	14	Surface	5.6	41.3	65.3	6.3	400	12	85	15	0	0
Soil	14	Surface	5.7	39.8	66.9	6.2	440	16	75	20	0	0
Soil	14	Medium	5.6	51.4	73.3	6.6	480	12	110	25	0	0
Soil	14	Medium	5.8	55.4	71.1	6.5	400	20	95	25	0	0
Soil	14	Medium	5.6	49.8	70	6.7	480	16	95	15	0	0
Soil	14	Bottom	5.8	57.6	75.3	6.8	560	16	80	20	0	0
Soil	14	Bottom	6.1	58.9	70.6	6.8	400	20	95	25	0	0
Soil	14	Bottom	6.2	60.2	71.5	6.6	480	24	100	30	0	0
Soil	21	Surface	5.8	42.3
Soil	21	Surface	5.6	43
Soil	21	Surface	5.8	40.2
Soil	21	Medium	5.8	44.3
Soil	21	Medium	5.7	45.6
Soil	21	Medium	5.4	42.1
Soil	21	Bottom	5.7	52.3
Soil	21	Bottom	6	55.3
Soil	21	Bottom	5.9	51.2
Soil	28	Surface	5.9	38.6	69.4	6.3	400	12	65	20	0	0
Soil	28	Surface	5.7	42.3	70	6.4	400	12	90	15	0	0
Soil	28	Surface	5.9	45.4	66.8	6.5	480	16	95	15	0	0
Soil	28	Medium	6	47.6	76.5	6.3	480	16	105	20	0	0
Soil	28	Medium	6.4	52.3	72.1	6.7	360	20	110	25	0	0
Soil	28	Medium	5.6	47.6	69.9	6.5	400	24	75	20	0	0
Soil	28	Bottom	5.8	55.6	70.3	6.5	400	24	90	25	0	0
Soil	28	Bottom	6	59.6	72.6	6.6	480	28	115	40	0	0
Soil	28	Bottom	6.2	63.2	75.3	6	480	28	80	35	0	0
Soil	35	Surface	5.8	38.6
Soil	35	Surface	5.8	40.2
Soil	35	Surface	6.1	35.5
Soil	35	Medium	6	42.3
Soil	35	Medium	6.4	45.5
Soil	35	Medium	5.4	44.4
Soil	35	Bottom	6.4	47.6
Soil	35	Bottom	6.2	50.5
Soil	35	Bottom	6.5	49.8
Soil	42	Surface	5.9	39.6	69.7	5.8	360	16	60	20	0	0
Soil	42	Surface	5.7	43.4	72.1	6.2	360	12	60	15	0	0
Soil	42	Surface	6	37.8	71.1	6.2	440	12	55	20	0	0
Soil	42	Medium	6.1	42.3	74.2	5.7	440	12	70	15	0	0
Soil	42	Medium	5.9	41.3	78.3	6.3	360	16	90	15	0	0
Soil	42	Medium	6	45.5	71.1	6.6	320	20	75	15	0	0
Soil	42	Bottom	6.6	52.3	74.5	5.7	400	20	100	20	0	0
Soil	42	Bottom	6.4	47.5	76.6	6.4	440	24	80	25	0	0
Soil	42	Bottom	6	50.2	77.3	6.3	480	24	85	30	0	0
Soil	49	Surface	6	36.7
Soil	49	Surface	6.2	39.5
Soil	49	Surface	5.7	37.2
Soil	49	Medium	6.1	45.3
Soil	49	Medium	6.3	42.1
Soil	49	Medium	5.9	47.5
Soil	49	Bottom	6.6	47.8
Soil	49	Bottom	6.4	45.6
Soil	49	Bottom	6	49.6
Soil	56	Surface	6.1	38.9	75.4	6.1	320	12	55	25	0	0
Soil	56	Surface	6.3	35.5	73.8	5.8	360	16	60	20	0	0
Soil	56	Surface	5.7	44.4	74.1	5.9	360	20	70	15	0	0
Soil	56	Medium	6.2	46.7	77.3	6.4	440	20	85	30	0	0
Soil	56	Medium	6.4	48.9	76.2	5.6	480	24	75	20	0	0
Soil	56	Medium	6	42.3	75.3	5.9	400	28	90	25	0	0
Soil	56	Bottom	6.3	53.4	77.3	6.2	440	28	60	30	0	0
Soil	56	Bottom	6	49.1	76.9	6.1	560	24	90	30	0	0
Soil	56	Bottom	6.5	47.2	78.5	5.7	400	28	85	15	0	0
Soil	63	Surface	6.2	43.1
Soil	63	Surface	6	45.6
Soil	63	Surface	6.3	41
Soil	63	Medium	6.3	45.5
Soil	63	Medium	6.1	48.6
Soil	63	Medium	5.9	49
Soil	63	Bottom	6.8	52.1
Soil	63	Bottom	6.5	44.6
Soil	63	Bottom	6.1	55.1
Soil	70	Surface	6.3	44.3	76.5	6.1	320	16	60	20	0	0
Soil	70	Surface	6	42.3	79.4	5.8	400	20	50	20	0	0
Soil	70	Surface	6.1	39.5	73.5	5.7	320	20	70	15	0	0
Soil	70	Medium	6.4	45.6	86.2	5.8	360	20	75	10	0	0
Soil	70	Medium	6.1	43.5	81.2	6.1	320	20	80	20	0	0
Soil	70	Medium	6.2	45.7	78.7	6.3	360	16	70	20	0	0
Soil	70	Bottom	6.3	49.9	82.3	5.8	440	24	80	15	0	0
Soil	70	Bottom	6.5	44	85.4	6.3	400	24	90	15	0	0
Soil	70	Bottom	6	48.8	83.1	6.5	440	20	65	30	0	0
Soil	77	Surface	6.4	37.9
Soil	77	Surface	6	42.3
Soil	77	Surface	6.2	39.6
Soil	77	Medium	6.5	52.4
Soil	77	Medium	6.4	53.2
Soil	77	Medium	6.7	47.4
Soil	77	Bottom	6.3	54.3
Soil	77	Bottom	6.3	55.6
Soil	77	Bottom	6.9	49.3
Soil	84	Surface	6.4	36.5	78.6	5.7	440	20	70	15	0	0
Soil	84	Surface	6.5	34.4	77.8	5.6	360	16	45	10	0	0
Soil	84	Surface	6.3	36.7	77.9	5.9	440	16	40	15	0	0
Soil	84	Medium	6.5	44.2	81.2	5.8	480	20	75	20	0	0
Soil	84	Medium	6.6	45.4	86.2	5.9	480	28	50	20	0	0
Soil	84	Medium	6.3	44.3	80.4	6.2	400	24	55	30	0	0
Soil	84	Bottom	6.7	52.3	84.3	5.8	480	24	60	30	0	0
Soil	84	Bottom	6.2	51.1	85.7	5.8	560	28	70	15	0	0
Soil	84	Bottom	6.5	48.7	84.6	6.4	440	28	45	25	0	0
Contaminated soil	0	Surface	5.3	38.2	68.7	6.6	80	0	15	0	60.6	78.78
Contaminated soil	0	Surface	5.1	40.3	63.4	5.7	40	4	15	5	64.2	83.46
Contaminated soil	0	Surface	5.4	45.5	66.6	6.3	80	4	10	5	65.3	84.89
Contaminated soil	0	Medium	5.3	44.3	75.2	6.4	280	12	60	15	19.5	25.35
Contaminated soil	0	Medium	5.4	45.6	71.3	6.2	320	12	75	10	17.5	22.75
Contaminated soil	0	Medium	5.1	43.4	77.8	5.3	240	8	70	10	16.4	21.32
Contaminated soil	0	Bottom	5.4	55.4	75.3	6.5	560	20	80	20	6.3	8.19
Contaminated soil	0	Bottom	5.6	45.6	76.4	6.4	640	24	100	15	8.9	11.57
Contaminated soil	0	Bottom	5.1	50.6	73.5	5.7	480	20	110	20	5.2	6.76
Contaminated soil	7	Surface	5	40.9
Contaminated soil	7	Surface	5	46.3
Contaminated soil	7	Surface	5.2	39.1
Contaminated soil	7	Medium	5.3	48.6
Contaminated soil	7	Medium	5.3	50.2
Contaminated soil	7	Medium	5.5	44.2
Contaminated soil	7	Bottom	5.4	51.2
Contaminated soil	7	Bottom	5.6	45.6
Contaminated soil	7	Bottom	5.1	52.1
Contaminated soil	14	Surface	5.1	46.6	68.5	6.2	160	4	20	5	50.3	65.39
Contaminated soil	14	Surface	5.4	39.1	67.9	6.1	120	4	20	10	55.4	72.02
Contaminated soil	14	Surface	5.3	38.9	65.6	5.4	80	0	15	10	51.6	67.08
Contaminated soil	14	Medium	5.2	47.6	77.5	6.3	160	4	55	10	30.6	39.78
Contaminated soil	14	Medium	5.3	52.4	74.5	5.8	120	0	40	10	37.2	48.36
Contaminated soil	14	Medium	5	45.8	75.3	5.2	160	0	35	5	28.7	37.31
Contaminated soil	14	Bottom	5.4	55.3	77.5	5.9	320	16	75	15	12.4	16.12
Contaminated soil	14	Bottom	5.5	50.5	74.6	5.9	360	24	85	20	17.4	22.62
Contaminated soil	14	Bottom	5.3	57.6	74.8	6.5	480	28	95	30	10.5	13.65
Contaminated soil	21	Surface	5.3	47.8
Contaminated soil	21	Surface	5.3	40
Contaminated soil	21	Surface	5.5	37.5
Contaminated soil	21	Medium	5.4	42.4
Contaminated soil	21	Medium	5.5	47.5
Contaminated soil	21	Medium	5.4	38.6
Contaminated soil	21	Bottom	5.6	51
Contaminated soil	21	Bottom	5.4	48
Contaminated soil	21	Bottom	5.7	50
Contaminated soil	28	Surface	5.3	35.5	73.2	5.9	160	4	20	5	40.2	52.26
Contaminated soil	28	Surface	5.6	39.6	70.1	6.1	160	4	15	10	43.2	56.16
Contaminated soil	28	Surface	5.2	46.2	68.7	5.7	80	0	20	5	42.2	54.86
Contaminated soil	28	Medium	5.3	45.4	76.4	6.3	120	8	40	10	25.6	33.28
Contaminated soil	28	Medium	5.5	47.6	76.3	5.7	120	4	45	10	29.6	38.48
Contaminated soil	28	Medium	5.1	46.7	74.5	5.8	160	8	40	5	30.2	39.26
Contaminated soil	28	Bottom	5.5	56	73.2	6.2	200	8	70	15	20.3	26.39
Contaminated soil	28	Bottom	5.5	60	77.6	5.8	240	12	75	20	25.9	33.67
Contaminated soil	28	Bottom	5.7	64	76.3	5.7	280	12	60	20	26.3	34.19
Contaminated soil	35	Surface	5.5	35.7
Contaminated soil	35	Surface	5.4	32.2
Contaminated soil	35	Surface	5.3	34.3
Contaminated soil	35	Medium	5.6	39.8
Contaminated soil	35	Medium	5.7	46.2
Contaminated soil	35	Medium	5.5	44.4
Contaminated soil	35	Bottom	5.6	46
Contaminated soil	35	Bottom	5.8	48
Contaminated soil	35	Bottom	5.5	49
Contaminated soil	42	Surface	5.6	37.2	73.2	5.6	200	8	15	5	32.2	41.86
Contaminated soil	42	Surface	5.6	39.9	71.1	5.8	160	4	20	10	36	46.8
Contaminated soil	42	Surface	5.5	34.3	69.8	5.6	120	4	10	5	37.8	49.14
Contaminated soil	42	Medium	5.7	38.9	78.3	5.5	120	4	25	5	27.6	35.88
Contaminated soil	42	Medium	5.7	40.1	75.3	6.2	120	0	15	5	29.7	38.61
Contaminated soil	42	Medium	5.4	44.4	77.4	5.7	120	4	10	10	22.5	29.25
Contaminated soil	42	Bottom	5.8	50	72.2	5.4	160	8	50	10	10.6	13.78
Contaminated soil	42	Bottom	5.4	46	77.8	6.3	200	8	45	10	15.6	20.28
Contaminated soil	42	Bottom	5.8	53	77.9	5.5	120	4	40	10	18.5	24.05
Contaminated soil	49	Surface	5.7	37.6
Contaminated soil	49	Surface	5.6	33.2
Contaminated soil	49	Surface	5.9	35.6
Contaminated soil	49	Medium	5.8	39.9
Contaminated soil	49	Medium	5.9	46.7
Contaminated soil	49	Medium	5.4	42.1
Contaminated soil	49	Bottom	6	46
Contaminated soil	49	Bottom	5.8	46
Contaminated soil	49	Bottom	6.1	43
Contaminated soil	56	Surface	5.7	39.4	75.4	5.4	120	4	15	5	25.6	33.28
Contaminated soil	56	Surface	5.3	31.1	74.4	5.2	120	0	10	5	22.7	29.51
Contaminated soil	56	Surface	5.6	36.7	71.3	5.1	200	4	10	5	28.8	37.44
Contaminated soil	56	Medium	5.8	42.3	79.5	5.5	120	4	10	5	19.7	25.61
Contaminated soil	56	Medium	5.7	47.4	76.5	5.6	160	4	10	10	18.6	24.18
Contaminated soil	56	Medium	5.7	39.5	80.3	5.8	200	4	15	5	17.5	22.75
Contaminated soil	56	Bottom	6	51	79.3	5.9	160	8	25	10	12.7	16.51
Contaminated soil	56	Bottom	5.7	47	83.5	5.5	160	8	20	10	13.4	17.42
Contaminated soil	56	Bottom	6.2	47	77.7	5.3	120	4	15	5	12.3	15.99
Contaminated soil	63	Surface	5.8	42.3
Contaminated soil	63	Surface	5.7	38.4
Contaminated soil	63	Surface	5.4	39.1
Contaminated soil	63	Medium	5.9	47.6
Contaminated soil	63	Medium	5.7	42.1
Contaminated soil	63	Medium	5.8	44.6
Contaminated soil	63	Bottom	6.2	50
Contaminated soil	63	Bottom	6	45
Contaminated soil	63	Bottom	5.9	49
Contaminated soil	70	Surface	5.8	38.6	77.4	5	200	4	20	15	19.6	25.48
Contaminated soil	70	Surface	5.8	35.5	76.3	5.4	160	4	20	10	17.4	22.62
Contaminated soil	70	Surface	5.7	33	75.6	5.6	200	8	25	15	20.2	26.26
Contaminated soil	70	Medium	6	46.7	81.2	5.7	160	4	20	15	15.6	20.28
Contaminated soil	70	Medium	6.2	42.3	83.3	5.3	240	8	20	15	13.4	17.42
Contaminated soil	70	Medium	5.7	39.8	78.8	5.3	120	8	30	10	10.8	14.04
Contaminated soil	70	Bottom	6.3	46	80.4	5.4	160	12	30	15	10.6	13.78
Contaminated soil	70	Bottom	6	44	81.1	5.3	200	8	35	25	10.8	14.04
Contaminated soil	70	Bottom	6	49	78.7	5.7	120	12	20	25	12.1	15.73
Contaminated soil	77	Surface	5.9	39.1
Contaminated soil	77	Surface	6	37.1
Contaminated soil	77	Surface	5.7	34.2
Contaminated soil	77	Medium	6.1	48.9
Contaminated soil	77	Medium	6.4	47.2
Contaminated soil	77	Medium	5.5	41.1
Contaminated soil	77	Bottom	6.2	51
Contaminated soil	77	Bottom	5.8	53
Contaminated soil	77	Bottom	6.1	50.2
Contaminated soil	84	Surface	6	32.1	82.5	4.9	200	4	25	15	15.2	19.76
Contaminated soil	84	Surface	6.1	36.6	77.6	5.2	160	4	20	25	12	15.6
Contaminated soil	84	Surface	5.9	30.4	80.5	5.3	120	8	35	20	18.3	23.79
Contaminated soil	84	Medium	6.1	43.2	82.3	5.7	240	12	25	15	10.3	13.39
Contaminated soil	84	Medium	6.2	44.2	81.1	5.2	200	8	35	25	12.1	15.73
Contaminated soil	84	Medium	5.9	39.7	79.9	4.9	280	8	35	25	10.3	13.39
Contaminated soil	84	Bottom	6.2	52	80.3	4.8	280	12	35	30	10.2	13.26
Contaminated soil	84	Bottom	6	49	81.4	5.6	320	12	40	25	11.2	14.56
Contaminated soil	84	Bottom	6.5	50	79.1	5.2	240	16	20	30	10.9	14.17
Biomixture	0	Surface	6.5	46.4	44.6	21.4	1000	28	300	70	0	0
Biomixture	0	Surface	6.6	51.3	45.3	23.4	1040	20	290	80	0	0
Biomixture	0	Surface	6.3	48.6	46.2	24.4	960	28	265	75	0	0
Biomixture	0	Medium	6.6	55.3	46.7	22.4	1040	32	285	60	0	0
Biomixture	0	Medium	6.3	57.6	45.6	24.4	1040	36	345	65	0	0
Biomixture	0	Medium	6.6	52.1	45.4	22.5	1080	36	315	50	0	0
Biomixture	0	Bottom	6.6	55.6	44.3	21.4	1040	36	285	70	0	0
Biomixture	0	Bottom	6.7	59.7	43.2	25.3	1080	36	265	80	0	0
Biomixture	0	Bottom	6.6	59.8	47.6	26.4	1120	32	245	90	0	0
Biomixture	7	Surface	6.7	45.3
Biomixture	7	Surface	6.7	50.2
Biomixture	7	Surface	6.9	47.6
Biomixture	7	Medium	6.7	55.4
Biomixture	7	Medium	6.7	57.5
Biomixture	7	Medium	6.8	54.3
Biomixture	7	Bottom	6.8	62.3
Biomixture	7	Bottom	6.9	57.7
Biomixture	7	Bottom	6.6	62.3
Biomixture	14	Surface	6.7	52.3	45.3	18.5	760	28	240	55	0	0
Biomixture	14	Surface	6.6	46.5	45.4	19.2	720	20	270	60	0	0
Biomixture	14	Surface	6.9	44.3	45.6	19.4	800	24	220	80	0	0
Biomixture	14	Medium	6.8	57.5	45.8	18	880	32	275	50	0	0
Biomixture	14	Medium	6.5	57.6	46.7	18.5	840	28	265	75	0	0
Biomixture	14	Medium	6.6	53.1	47.2	18.6	880	28	245	65	0	0
Biomixture	14	Bottom	6.8	64.3	45.6	19.1	920	28	225	90	0	0
Biomixture	14	Bottom	6.8	61.3	45.8	18.6	880	32	230	55	0	0
Biomixture	14	Bottom	7	66	45.8	18.5	1000	28	195	60	0	0
Biomixture	21	Surface	6.8	52.4
Biomixture	21	Surface	6.5	48.5
Biomixture	21	Surface	7.2	45.9
Biomixture	21	Medium	6.9	49.9
Biomixture	21	Medium	6.9	55
Biomixture	21	Medium	6.7	47.5
Biomixture	21	Bottom	6.7	58.2
Biomixture	21	Bottom	6.8	53.1
Biomixture	21	Bottom	6.5	58.4
Biomixture	28	Surface	7	46.7	47.6	18.6	680	24	240	60	0	0
Biomixture	28	Surface	6.8	48.5	48.4	18.5	640	20	210	65	0	0
Biomixture	28	Surface	7	51.3	48.2	17.8	640	28	195	80	0	0
Biomixture	28	Medium	7.1	52.3	51.3	17.3	720	28	215	85	0	0
Biomixture	28	Medium	7.2	57.1	50.1	17.1	760	28	225	95	0	0
Biomixture	28	Medium	7.3	55.3	48.6	16.8	880	32	185	70	0	0
Biomixture	28	Bottom	6.9	66.5	46.3	18.4	760	32	195	85	0	0
Biomixture	28	Bottom	6.5	62.3	47.6	18.3	840	32	230	70	0	0
Biomixture	28	Bottom	7	70.1	48.3	17.9	840	28	205	75	0	0
Biomixture	35	Surface	7.2	43.2
Biomixture	35	Surface	7.4	45.6
Biomixture	35	Surface	7.6	39.9
Biomixture	35	Medium	7.4	49.7
Biomixture	35	Medium	7.5	51.2
Biomixture	35	Medium	7.4	51.9
Biomixture	35	Bottom	7.2	55.4
Biomixture	35	Bottom	7.4	57.8
Biomixture	35	Bottom	7.6	52.3
Biomixture	42	Surface	7.4	45.6	48.3	17.5	600	28	145	55	0	0
Biomixture	42	Surface	7.4	46.6	49.1	17.6	520	20	175	70	0	0
Biomixture	42	Surface	7.6	41.2	47.6	17.1	480	28	165	60	0	0
Biomixture	42	Medium	7.5	47.7	52.1	16.6	720	24	195	85	0	0
Biomixture	42	Medium	7.7	44.3	54.3	16.8	760	28	190	80	0	0
Biomixture	42	Medium	7.3	55.3	55.4	17.1	680	28	160	85	0	0
Biomixture	42	Bottom	7.3	58.4	52.3	17.5	680	28	155	85	0	0
Biomixture	42	Bottom	7.5	52.3	55.9	17.5	720	32	185	65	0	0
Biomixture	42	Bottom	7.3	62.3	52.1	16.5	640	32	175	65	0	0
Biomixture	49	Surface	7.5	44.6
Biomixture	49	Surface	7.8	43.2
Biomixture	49	Surface	7.3	47.8
Biomixture	49	Medium	7.6	49.8
Biomixture	49	Medium	7.2	52.1
Biomixture	49	Medium	7.9	55.2
Biomixture	49	Bottom	7.5	54.5
Biomixture	49	Bottom	7.7	55.6
Biomixture	49	Bottom	7.6	55.5
Biomixture	56	Surface	7.7	44.3	51.1	16.2	520	28	135	65	0	0
Biomixture	56	Surface	7.9	41.1	52.2	16.3	480	24	125	60	0	0
Biomixture	56	Surface	7.5	47.5	49.8	17.9	440	24	100	60	0	0
Biomixture	56	Medium	7.8	50.2	55.2	15.8	720	28	150	75	0	0
Biomixture	56	Medium	7.7	55.4	53.2	15.6	760	32	165	65	0	0
Biomixture	56	Medium	7.6	49.8	52.2	17.4	800	32	170	95	0	0
Biomixture	56	Bottom	7.7	57.8	54.3	16.7	760	28	180	90	0	0
Biomixture	56	Bottom	7.5	52.3	56.1	16.9	760	28	175	70	0	0
Biomixture	56	Bottom	7.6	53.4	52.1	17.1	840	32	165	75	0	0
Biomixture	63	Surface	7.7	48.9
Biomixture	63	Surface	7.4	45.7
Biomixture	63	Surface	7.9	48.7
Biomixture	63	Medium	7.8	50.3
Biomixture	63	Medium	7.7	54.2
Biomixture	63	Medium	8	49.8
Biomixture	63	Bottom	7.8	59.3
Biomixture	63	Bottom	8	52.3
Biomixture	63	Bottom	7.5	57
Biomixture	70	Surface	7.9	46.6	55.4	16.4	560	24	100	45	0	0
Biomixture	70	Surface	8	44.3	54.1	16.7	560	28	110	60	0	0
Biomixture	70	Surface	7.7	41.1	56.3	16.4	520	24	95	70	0	0
Biomixture	70	Medium	8.1	53.2	57.6	15.7	880	28	150	45	0	0
Biomixture	70	Medium	8.3	54.1	55.4	15.9	760	28	135	75	0	0
Biomixture	70	Medium	7.7	48.3	54.3	15.6	680	24	130	55	0	0
Biomixture	70	Bottom	8	53.6	58.7	16.3	760	28	160	90	0	0
Biomixture	70	Bottom	8.2	56.7	56.7	16.6	720	28	165	60	0	0
Biomixture	70	Bottom	7.7	54.3	55.2	16.9	800	24	140	50	0	0
Biomixture	77	Surface	8.1	44.4
Biomixture	77	Surface	8.4	45.4
Biomixture	77	Surface	7.8	42.3
Biomixture	77	Medium	8.2	55.5
Biomixture	77	Medium	8	54.2
Biomixture	77	Medium	7.9	48.7
Biomixture	77	Bottom	8.1	58
Biomixture	77	Bottom	8	60.6
Biomixture	77	Bottom	7.7	58.3
Biomixture	84	Surface	8.2	44.1	57.8	15.1	560	24	110	65	0	0
Biomixture	84	Surface	8.5	39.8	56.4	14.8	640	24	90	60	0	0
Biomixture	84	Surface	7.9	35.6	55.4	14.6	680	24	125	65	0	0
Biomixture	84	Medium	8.1	49.8	59.3	13.7	720	28	125	65	0	0
Biomixture	84	Medium	8.4	52.3	58.2	14.6	760	28	115	90	0	0
Biomixture	84	Medium	7.9	50	57.3	13.7	760	32	145	60	0	0
Biomixture	84	Bottom	8.2	57.1	60.1	14.7	720	28	135	60	0	0
Biomixture	84	Bottom	8.5	56.4	58.4	15	680	24	115	55	0	0
Biomixture	84	Bottom	7.9	52.4	56.4	15.3	840	28	95	75	0	0
Contaminated biomixture	0	Surface	6.5	45.4	43	21.4	240	8	100	10	51.2	66.56
Contaminated biomixture	0	Surface	6.3	49.3	40.4	23.4	280	4	90	5	48.3	62.79
Contaminated biomixture	0	Surface	6.6	42.1	45.1	24.4	320	8	75	10	53.2	69.16
Contaminated biomixture	0	Medium	6.7	51.2	45.1	22.4	920	32	230	45	15.1	19.63
Contaminated biomixture	0	Medium	6.8	47.6	42.3	24.4	1000	36	245	40	10.7	13.91
Contaminated biomixture	0	Medium	6.5	54.4	46.2	22.5	1080	36	275	35	13.4	17.42
Contaminated biomixture	0	Bottom	6.8	55.6	45.4	21.4	960	36	275	25	2.6	3.38
Contaminated biomixture	0	Bottom	6.7	51.3	47.6	25.3	1080	36	210	45	5.4	7.02
Contaminated biomixture	0	Bottom	6.8	58.9	46.9	26.4	1120	32	220	30	3.1	4.03
Contaminated biomixture	7	Surface	6.2	45
Contaminated biomixture	7	Surface	6	47.3
Contaminated biomixture	7	Surface	5.9	43.2
Contaminated biomixture	7	Medium	6.5	55.5
Contaminated biomixture	7	Medium	6.1	57.6
Contaminated biomixture	7	Medium	6.7	48.6
Contaminated biomixture	7	Bottom	6.6	53.4
Contaminated biomixture	7	Bottom	6.4	52.1
Contaminated biomixture	7	Bottom	6.4	58.7
Contaminated biomixture	14	Surface	6.2	47.6	46.7	22.4	320	8	125	10	40.6	52.78
Contaminated biomixture	14	Surface	6	40.3	48.7	21.4	400	12	145	15	38.5	50.05
Contaminated biomixture	14	Surface	6.1	41.4	45.6	22.5	360	8	140	10	37.5	48.75
Contaminated biomixture	14	Medium	6.4	55.4	50.8	20.5	600	16	205	30	26.7	34.71
Contaminated biomixture	14	Medium	6.6	53.2	48.7	21.9	520	16	195	25	28.6	37.18
Contaminated biomixture	14	Medium	6.6	50.1	47.7	20.7	480	20	215	30	24.6	31.98
Contaminated biomixture	14	Bottom	6.6	60.2	51.2	19.5	600	20	255	45	7.2	9.36
Contaminated biomixture	14	Bottom	6.7	65.2	49.1	19.3	480	16	240	55	6.4	8.32
Contaminated biomixture	14	Bottom	6.5	58.4	48.9	19.4	400	20	235	40	8.1	10.53
Contaminated biomixture	21	Surface	6.5	47.6
Contaminated biomixture	21	Surface	6.3	43.2
Contaminated biomixture	21	Surface	6.8	43.1
Contaminated biomixture	21	Medium	6.7	48.6
Contaminated biomixture	21	Medium	6.8	49.1
Contaminated biomixture	21	Medium	6.6	40.2
Contaminated biomixture	21	Bottom	6.8	55.1
Contaminated biomixture	21	Bottom	6.5	54.3
Contaminated biomixture	21	Bottom	6.8	55.1
Contaminated biomixture	28	Surface	6.7	39.8	50.5	21.4	400	8	95	10	25.6	33.28
Contaminated biomixture	28	Surface	6.8	46.5	48.1	21	320	8	75	5	27.8	36.14
Contaminated biomixture	28	Surface	6.4	47.5	47.2	20.7	400	4	60	5	28.7	37.31
Contaminated biomixture	28	Medium	6.8	52.3	51.2	19.3	400	8	90	15	22.3	28.99
Contaminated biomixture	28	Medium	7	55.4	50.3	19.6	480	8	85	10	26.4	34.32
Contaminated biomixture	28	Medium	6.5	56.2	52.3	20.1	440	12	100	5	26.7	34.71
Contaminated biomixture	28	Bottom	6.5	65.2	54.6	18.5	560	16	195	25	10.5	13.65
Contaminated biomixture	28	Bottom	6.7	63.2	50.5	18.7	440	12	175	25	8.7	11.31
Contaminated biomixture	28	Bottom	6.6	69	51.3	18.9	480	16	155	40	9.2	11.96
Contaminated biomixture	35	Surface	6.9	38.9
Contaminated biomixture	35	Surface	7	42.6
Contaminated biomixture	35	Surface	6.6	37.1
Contaminated biomixture	35	Medium	7	47.9
Contaminated biomixture	35	Medium	7.2	46.5
Contaminated biomixture	35	Medium	6.7	47
Contaminated biomixture	35	Bottom	6.7	55
Contaminated biomixture	35	Bottom	6.8	55.2
Contaminated biomixture	35	Bottom	6.6	48.1
Contaminated biomixture	42	Surface	7.1	38.6	51.1	19.6	400	12	50	10	15.5	20.15
Contaminated biomixture	42	Surface	7.4	42.1	49.8	19.9	520	8	60	10	16.7	21.71
Contaminated biomixture	42	Surface	6.9	37.5	50.2	20	480	4	40	5	18.9	24.57
Contaminated biomixture	42	Medium	7.2	42.1	53.2	18.9	440	8	80	15	26.3	34.19
Contaminated biomixture	42	Medium	7.4	49	52.8	19.3	400	8	75	10	27.5	35.75
Contaminated biomixture	42	Medium	7.2	43.6	52.1	18.5	440	12	95	5	28.4	36.92
Contaminated biomixture	42	Bottom	7.1	55.5	54.2	18.1	480	16	140	20	8.3	10.79
Contaminated biomixture	42	Bottom	6.9	49.1	53.1	17.6	440	16	145	25	9.6	12.48
Contaminated biomixture	42	Bottom	7.3	58.2	52.5	17.8	520	16	125	35	6.8	8.84
Contaminated biomixture	49	Surface	7.3	43.4
Contaminated biomixture	49	Surface	7.5	37.7
Contaminated biomixture	49	Surface	6.9	45.2
Contaminated biomixture	49	Medium	7.3	48.9
Contaminated biomixture	49	Medium	7.3	40.6
Contaminated biomixture	49	Medium	7.4	45.6
Contaminated biomixture	49	Bottom	7.2	52.3
Contaminated biomixture	49	Bottom	7.4	48.5
Contaminated biomixture	49	Bottom	7.3	59
Contaminated biomixture	56	Surface	7.5	38.6	55.4	18.7	520	16	100	25	13.2	17.16
Contaminated biomixture	56	Surface	7.9	39.4	53.1	18.5	560	12	95	20	10.4	13.52
Contaminated biomixture	56	Surface	7.2	41.6	51.1	18.6	640	16	85	30	9.8	12.74
Contaminated biomixture	56	Medium	7.5	52.1	55.4	17.6	560	12	110	30	16.3	21.19
Contaminated biomixture	56	Medium	7.3	49.1	52.1	17.3	600	20	90	20	18.3	23.79
Contaminated biomixture	56	Medium	7.7	44.2	54.3	17.1	600	20	125	15	16.2	21.06
Contaminated biomixture	56	Bottom	7.4	49.1	54.3	17.1	560	24	145	40	4.6	5.98
Contaminated biomixture	56	Bottom	7.6	55.2	53.1	16.9	640	12	150	45	4.3	5.59
Contaminated biomixture	56	Bottom	7.2	51	56.2	16.8	560	16	125	40	3.6	4.68
Contaminated biomixture	63	Surface	7.5	46.7
Contaminated biomixture	63	Surface	7.2	45.2
Contaminated biomixture	63	Surface	7.7	38.9
Contaminated biomixture	63	Medium	7.6	43.2
Contaminated biomixture	63	Medium	7.8	49.2
Contaminated biomixture	63	Medium	7.3	47.6
Contaminated biomixture	63	Bottom	7.6	55.7
Contaminated biomixture	63	Bottom	7.4	48.2
Contaminated biomixture	63	Bottom	7.5	53.9
Contaminated biomixture	70	Surface	7.3	48.6	55.4	17.4	600	16	115	25	8.3	10.79
Contaminated biomixture	70	Surface	7.6	41.1	52.2	17.9	640	20	120	20	8.2	10.66
Contaminated biomixture	70	Surface	7	39.9	56.1	17.8	520	16	85	10	7.4	9.62
Contaminated biomixture	70	Medium	7.6	44.3	53.2	16.8	640	16	130	35	10.3	13.39
Contaminated biomixture	70	Medium	7.7	49.2	55.2	16.8	600	20	135	30	8.6	11.18
Contaminated biomixture	70	Medium	7.7	46	54.3	16.5	640	20	120	40	9.1	11.83
Contaminated biomixture	70	Bottom	7.8	55.9	54.5	16.5	600	24	125	25	2	2.6
Contaminated biomixture	70	Bottom	7.5	48.9	52.4	16.7	680	16	110	30	1.5	1.95
Contaminated biomixture	70	Bottom	7.3	56.9	57.8	16.8	680	20	85	40	2.3	2.99
Contaminated biomixture	77	Surface	7.5	45.2
Contaminated biomixture	77	Surface	7.1	46.5
Contaminated biomixture	77	Surface	7.7	36.1
Contaminated biomixture	77	Medium	7.4	53.4
Contaminated biomixture	77	Medium	7.8	50.1
Contaminated biomixture	77	Medium	7.1	46.8
Contaminated biomixture	77	Bottom	7.6	60
Contaminated biomixture	77	Bottom	7.4	57.3
Contaminated biomixture	77	Bottom	7.7	59
Contaminated biomixture	84	Surface	7.2	33.2	56.6	16.5	600	16	120	25	4.2	5.46
Contaminated biomixture	84	Surface	7.4	35.2	55.4	16.5	720	16	85	45	3.9	5.07
Contaminated biomixture	84	Surface	7.1	34.1	56.8	16.9	560	20	110	35	3.7	4.81
Contaminated biomixture	84	Medium	7.6	47.8	57.6	15.3	640	24	110	50	4.7	6.11
Contaminated biomixture	84	Medium	7.5	49.6	53.4	15.8	600	16	80	40	4.5	5.85
Contaminated biomixture	84	Medium	7.6	44.3	52.1	15.7	720	24	125	45	3.3	4.29
Contaminated biomixture	84	Bottom	7.5	58.4	54.5	16.1	720	16	120	45	1.3	1.69
Contaminated biomixture	84	Bottom	7.6	53.1	57.6	16.3	680	20	85	45	1.3	1.69
Contaminated biomixture	84	Bottom	7.3	54.6	55.5	15.8	560	24	110	35	1.5	1.95
